# Supplementary material for: An effective orange-red solution-processed circularly polarized organic light-emitting diode
Source: Royal Society of Chemistry journal article supplement (doi:10.1039/d4cc04938a), 2024-01-01
Supplement: d4cc04938a1.pdf [file d4cc04938a1.pdf]

# Supporting Information

## Effective Orange-Red Solution-Processed Circularly Polarized Organic Light-

### Emitting Diode

Junqing Wang,<sup>a</sup> Xiaoyi Lai,<sup>a</sup> Yongzhi Zhou,<sup>a,b</sup> Lei Hua,<sup>a</sup> Weiguo Zhu,<sup>a</sup> Pengfei Duan,<sup>b\*</sup>

Yafei Wang<sup>a\*</sup>

<sup>a</sup>School of Materials Science & Engineering, Jiangsu Collaborative Innovation Center of Photovoltaic Science and Engineering, Jiangsu Engineering Laboratory of Light-Electricity-Heat Energy-Converting Materials and Applications, Changzhou University, Changzhou 213164, PR China. Email: Y. Wang: [qiji830404@hotmail.com](mailto:qiji830404@hotmail.com)

<sup>b</sup>CAS Key Laboratory of Nanosystem and Hierarchical Fabrication, National Center for Nanoscience and Technology (NCNST), No.11, ZhongGuanCun BeiYiTiao, Beijing 100190, P. R. China. P. Duan: E-mail: [duanpf@nanoctr.cn](mailto:duanpf@nanoctr.cn)

## Table of Contents

|                                                      |           |
|------------------------------------------------------|-----------|
| <b>General Informations .....</b>                    | <b>2</b>  |
| <b>Theoretical Calculations .....</b>                | <b>3</b>  |
| <b>Device Fabrication and Characterization .....</b> | <b>3</b>  |
| <b>Materials and Methods .....</b>                   | <b>4</b>  |
| <b>Synthesis and Characterization .....</b>          | <b>4</b>  |
| <b>Thermal properties .....</b>                      | <b>15</b> |
| <b>Electrochemical property .....</b>                | <b>15</b> |
| <b>Theoretical calculation .....</b>                 | <b>16</b> |
| <b>Photophysical properties .....</b>                | <b>17</b> |
| <b>Electroluminescence performances .....</b>        | <b>18</b> |

## General Informations

$^1\text{H}$  and  $^{13}\text{C}$  nuclear magnetic resonance (NMR) spectra were acquired using a Bruker Dex-400 NMR spectrometer at room temperature, employing  $\text{CDCl}_3$  or DMSO as solvents and tetramethyl silane as an internal standard. The NMR chemical shifts are reported in ppm with reference to residual protons and carbons of  $\text{CDCl}_3$  ( $\delta$  7.26 ppm in  $^1\text{H}$  NMR,  $\delta$  77.16 ppm in  $^{13}\text{C}$  NMR), DMSO ( $\delta$  2.62 ppm in  $^1\text{H}$  NMR,  $\delta$  39.52 ppm in  $^{13}\text{C}$  NMR). Mass spectra (MS) were recorded on a Bruker Autoflex MALDI-TOF instrument using dithranol as a matrix. Thermogravimetric analysis (TGA) was detected with a NETZSCH STA449 from 25 °C to 600 °C at a 20 °C/min heating rate under  $\text{N}_2$  atmosphere. The degradation temperature ( $T_d$ ) was determined based on the 5% weight loss. Differential scanning calorimetry (DSC) was performed on a TAQ2000 differential scanning calorimeter at a heating rate of 10 °C  $\text{min}^{-1}$  from 30 to 300 °C under nitrogen atmosphere. Cyclic voltammetry measurements were performed using a 273 A (Princeton Applied Research). Electrochemical property was evaluated by cyclic voltammetry with three typical electrodes in degassed  $\text{CH}_3\text{CN}$  solution with a rate of 100 mV/s. The CV system employed  $\text{Bu}_4\text{NPF}_6$  as electrolyte. Platinum disk was used as the working electrode, platinum wire was regarded as the counter electrode and silver wire was used as the reference electrode. Ferrocenium/ferrocene ( $\text{Fc}/\text{Fc}^+$ ) was used as the external standard compound. Each oxidation potential was calibrated using ferrocene as a reference.

UV-visible absorption spectra were recorded on a Shimadzu UV-2600. Steady-state and transient-state PL spectra, photoluminescence quantum yield (PLQY) and lifetime were carried out by using an Edinburgh FLS1000 Photoluminescence Spectrometer. Circular dichroism (CD) was measured on a Jasco J-1500 CD Spectrometer. Circularly polarized photoluminescence (CPPL) and electroluminescence (CPEL) spectra were measured on a Jasco CPL-200 spectrometer. The test mode adopted the "Slit" mode with the  $E_x$  and  $E_m$  Slit width set at 3000  $\mu\text{m}$ , and the digital integration time (D.I.T.) was set at 2.0 s with multiple accumulations.

## Theoretical Calculations

Density functional theory (DFT) computations encompassing geometrical optimization and electronic properties evaluations of these chiral thermally activated delayed fluorescence (TADF) molecules at ground-states were conducted using the Gaussian 16 software package at the PBE1PBE/6-311g (d, p) level. The energy levels of the excited states were computed employing the time-dependent DFT (TD-DFT) method at the same PBE1PBE/6-311g (d, p) level. Spin-orbit coupling matrix element (SOCME) values between the  $S_1$  and  $T_n$  ( $n = 1\sim 4$ ) states were calculated with ORCA 4.2.1 package at PBE0 /TZVP. Configuration optimization of the lowest singlet states ( $S_1$ ) of these chiral molecules was executed through TD-DFT at the PBE1PBE/6-311g (d, p) level, with relevant parameters for circularly polarized photoluminescence (CPPL) being concurrently output. All calculations were performed in the gas phase and visualized using GaussView 6.0 or VMD 1.9.3.

## Device Fabrication and Characterization

Poly(styrenesulfonate) (PEDOT: PSS) was purchased from Xi'an Polymer Light Technology Corp. TCTA (4,4',4''-Tris(carbazol-9-yl)-triphenylamine), PVK (Poly(N-vinylcarbazole), DtBuCzB (Indolo[3,2,1de]indolo[3',2',1':8,1][1,4]benzazaborino[2,3,4-kl]phenazaborine,2,5,15,18-tetrakis(1,1-dimethylethyl), DPEPO (Bis[2(diphenylphosphino)phenyl]ether oxide) and (TmPyPB)1,3,5-tris[(3-pyridyl)phen3-yl]benzene, and LiF were purchased from Lumtec.

In devices, PEDOT: PSS was used as hole injection material. TCTA was used as host material. **(R)-ad-PXZ/(S)-ad-PXZ** were used as emission layer and DtBuCzB was used as sensitizer. PVK was used as hole transporting layer. TmPyPB, DPEPO and LiF were used as electron transport, hole blocking and injection materials respectively. (Indium tin oxide) (ITO) and (Aluminium) (Al) were used as anode and cathode materials respectively. All commercially available reagents were used without further purification.

The substrates were successively cleaned with isopropyl alcohol, acetone, detergent, deionized water, and isopropyl alcohol in an ultrasonic bath and then dried overnight in the oven.

The substrates pre-treated by oxygen plasma to increase the work function of the ITO film. Then, 35 nm-thick PEDOT: PSS was spin-coated onto the ITO substrates at 3200 rpm for 30 s and annealed at 150 °C for 15 min. And then emissive layer was spin coated and annealed at 60 °C for 30 min using a precursor containing different materials co-dissolved in chloroform or toluene. The films of DPEPO, TmPyPB, LiF and aluminum were prepared by thermal evaporation under a vacuum of  $1 \times 10^{-4}$  Pa. Each sample has an active area of 0.04 cm<sup>2</sup>. All the devices were encapsulated before characterization to prevent degradation and emission quenching caused by oxygen and water. The EL spectra and J–V–L curves were obtained with a PHOTORESEARCH Spectra Scan PR735 photometer and a KEITHLEY 2400 Source Meter constant current source at room temperature. The EQE values were calculated by assuming a Lambertian distribution.

### **Materials and Methods**

All the commercially available reagents and solvents used in this work were used directly unless otherwise mentioned. Chiral source of R/S [1,1'-binaphthalene]-2,2'-diamine, were purchased from Shanghai Daicel Corporation, All reagents used in the experiments were purchased from commercial sources without further purification. For column chromatography, silica gel with 200–300 mesh was used.

### **Synthesis and Characterization**

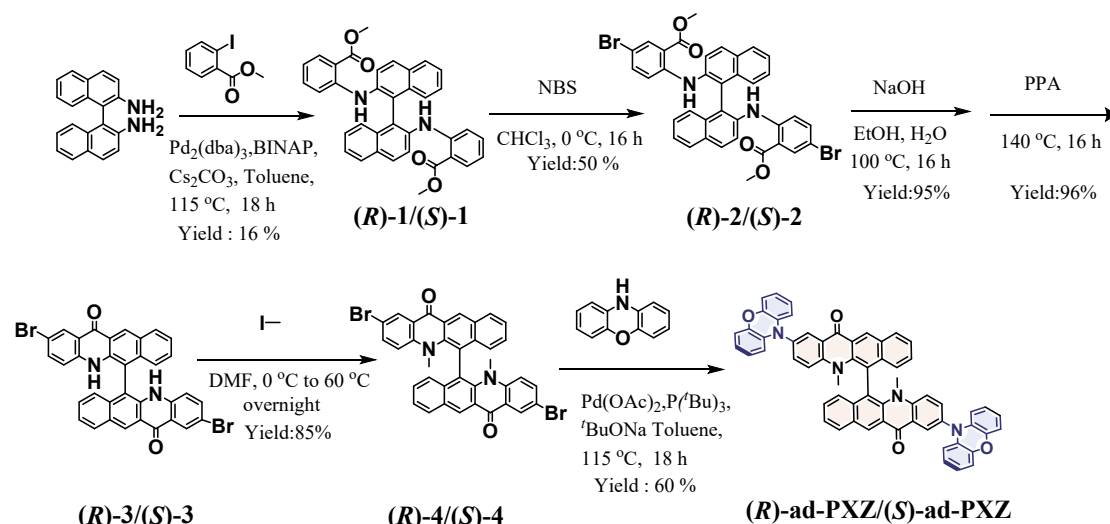

**Scheme S1.** Synthesis routes of the **(R)-ad-PXZ/(S)-ad-PXZ**.

**Synthesis of (R)-1/(S)-1:** **(R)** -[1,1'-binaphthalene]-2,2'-diamine /**(S)**-[1,1'-binaphthalene]-2,2'-diamine (BINAM) (2.0 g, 7.0 mmol), methyl 2-iodobenzoate (5.5 g, 21.0 mmol), Tris(dibenzylideneacetone)dipalladium (384.9 mg, 0.4 mmol), 1,1'-Binaphthyl-2,2'-diphenyl phosphine (525.2 mg, 0.8 mmol) and Cesium carbonate (12.4 g, 35.1 mmol) were dissolved in anhydrous toluene (100.0 mL). The mixture was heated to 115 °C for 18 hours under a Nitrogen atmosphere. After cooling to room temperature, the mixture was extracted with dichloromethane. The combined organic layer was washed by saturated brine, then dried over anhydrous MgSO<sub>4</sub>. The crude was purified by silica gel column (ethyl acetate/petroleum ether = 1/6, v/v) to give white powder of **(R)-1/(S)-1**.

For **(R)-1** (1.0 g, yield: 16 %): <sup>1</sup>H NMR (400 MHz, Chloroform-d) δ 8.65 (s, 2H), 7.91 (d, J = 8.9 Hz, 2H), 7.87 (d, J = 8.2 Hz, 2H), 7.77 (d, J = 8.9 Hz, 2H), 7.71 (dd, J = 7.9, 1.7 Hz, 2H), 7.35 (t, J = 8.1, 6.5, 1.5 Hz, 2H), 7.29 (d, J = 8.5 Hz, 2H), 7.24 – 7.18 (m, 4H), 7.13 – 7.08 (m, 2H), 6.63 – 6.58 (m, 2H), 3.41 (s, 6H) (**Fig S1**).

For **(S)-1** (1.0 g, yield: 16 %): <sup>1</sup>H NMR (400 MHz, Chloroform-d) δ 8.64 (s, 2H), 7.91 (d, J = 8.9 Hz, 2H), 7.87 (d, J = 8.2 Hz, 2H), 7.76 (d, J = 8.9 Hz, 2H), 7.71 (d, J = 8.0 Hz, 2H), 7.35 (t, J = 7.4 Hz, 2H), 7.28 (d, J = 8.5 Hz, 2H), 7.23 (d, J = 6.6 Hz, 2H), 7.19 (d, J = 8.4 Hz, 2H), 7.12 – 7.08 (m, 2H), 6.60 (t, J = 7.6 Hz, 2H), 3.41 (s, 6H) (**Fig S2**).

**Synthesis of (R)-2/(S)-2:** To a colourless solution of NBS (643.5 mg, 2.8 mmol, 2 equivalents) in Trichloromethane (CHCl<sub>3</sub>) (20.0 mL) was added a yellow solution of **(R)-**

**1/(S)-1** (1.0 g, 1.8 mmol) in CHCl<sub>3</sub> (5.0 mL). The colourless solution immediately turned bright yellow. After stirring from 0 °C to the room temperature for 16 h in the dark and under a Nitrogen atmosphere, the mixture was extracted with dichloromethane. The combined organic layer was washed by saturated brine, then dried over anhydrous MgSO<sub>4</sub>. This was followed by recrystallization with CHCl<sub>3</sub> and ethanol (EtOH). The product was obtained as yellow solid.

For **(R)-2** (600.0 mg, yield: 50 %): <sup>1</sup>H NMR (400 MHz, Chloroform-d) δ 8.67 (s, 2H), 7.94 (d, J = 8.9 Hz, 2H), 7.91 (d, J = 8.1 Hz, 2H), 7.83 (d, J = 2.5 Hz, 2H), 7.67 (d, J = 8.9 Hz, 2H), 7.42 (ddd, J = 8.1, 6.8, 1.3 Hz, 2H), 7.30 – 7.27 (m, 2H), 7.19 (d, J = 8.4 Hz, 2H), 7.12 (dd, J = 9.0, 2.5 Hz, 2H), 7.02 (d, J = 9.0 Hz, 2H), 3.48 (s, 6H) (**Fig S3**).

For **(S)-2** (600.0 mg, yield: 50 %): <sup>1</sup>H NMR (400 MHz, Chloroform-d) δ 8.67 (s, 2H), 7.94 (d, J = 8.9 Hz, 2H), 7.91 (d, J = 8.1 Hz, 2H), 7.82 (d, J = 2.5 Hz, 2H), 7.67 (d, J = 8.8 Hz, 2H), 7.44 – 7.39 (m, 2H), 7.29 (d, J = 8.5 Hz, 2H), 7.19 (d, J = 8.5 Hz, 2H), 7.12 (dd, J = 9.1, 2.5 Hz, 2H), 7.02 (d, J = 9.0 Hz, 2H), 3.48 (s, 6H) (**Fig S4**).

**Synthesis of (R)-3/(S)-3: (R)-2/(S)-2** (580.0 mg, 1.2 mmol) and Sodium hydroxide (1.3 g, 23.7 mmol) were dissolved in the mixture of EtOH (10.0 mL) and distilled water (10.0 mL). After the reaction was heated to 100 °C for 12 hours. After the reaction cooling to room temperature, hydrochloric acid (1.0 mol L<sup>-1</sup>) was used to neutralize the solution. The solid was filtered and washed with water and petroleum ether. Yellow solid was acquired through drying. Subsequently, the yellow solid was added into a round-bottom flask, then polyphosphoric acid (PPA) was added until complete coverage of the yellow solid and stirred well with a spatula. The reaction mixture was stirred at 140 °C for 16 h. The resulting mixture was cooled to room temperature and poured into water. The precipitating solid of **(R)-3/(S)-3** was washed by distilled water and collected (520.0 mg, 96 %).

For **(R)-3** (520.0 mg, yield: 96 %): <sup>1</sup>H NMR (400 MHz, DMSO-d<sub>6</sub>) δ 9.96 (s, 2H), 9.31 (s, 2H), 8.39 (d, J = 8.3 Hz, 2H), 8.34 (s, 2H), 7.70 (d, J = 8.9 Hz, 2H), 7.50 – 7.45 (m, 4H), 7.35 (t, J = 7.8 Hz, 2H), 6.84 (d, J = 8.7 Hz, 2H) (**Fig S5**).

For **(S)-3** (520.0 mg, yield: 96 %): <sup>1</sup>H NMR (400 MHz, DMSO-d<sub>6</sub>) δ 9.98 (s, 2H), 9.30 (s, 2H), 8.38 (d, J = 8.2 Hz, 2H), 8.33 (s, 2H), 7.69 (d, J = 8.8 Hz, 2H), 7.48 (d, J = 8.5 Hz, 4H), 7.37 – 7.31 (t, J = 7.6 Hz 2H), 6.84 (d, J = 8.3 Hz, 2H) (**Fig S6**).

**Synthesis of (R)-4/(S)-4:** **(R)-3/(S)-3** (700.0 mg, 1.1 mmol) was dissolved in dimethylformamide (10.0 mL) and cooled to 0 °C. Sodium hydride (347.6 mg, 8.6 mmol) was then added in portions while stirring. This was then heated to 60 °C and stirred for 30 mins at which point methyl iodide (1.2 g, 8.6 mmol) was added and stirred at 60 °C for 18 h. Upon completion, the reaction was cooled to ambient temperature and quenched with water. The solid was filtered via suction filtration and dissolved in dichloromethane then washed with a brine solution. The organic fractions were combined and dried over MgSO<sub>4</sub> with the volatiles being removed in vacuo to yield a flaky orange-red solid.

For **(R)-4** (520.0 mg, yield: 85 %): <sup>1</sup>H NMR (400 MHz, Chloroform-d) δ 9.27 (s, 2H), 8.51 (s, 2H), 8.22 (d, J = 8.7 Hz, 2H), 7.58 – 7.47 (m, 8H), 6.59 (d, J = 9.0 Hz, 2H), 2.49 (s, 6H) (**Fig S7**).

For **(S)-4** (520.0 mg, yield: 85 %): <sup>1</sup>H NMR (400 MHz, Chloroform-d) δ 9.28 (s, 2H), 8.51 (s, 2H), 8.22 (d, J = 8.0 Hz, 2H), 7.58 – 7.47 (m, 8H), 6.59 (d, J = 9.0 Hz, 2H), 2.49 (s, 6H) (**Fig S8**).

**Synthesis of (R)-ad-PXZ/(S)-ad-PXZ:** **(R)-4/(S)-4** (300.0 mg, 0.4 mmol.), Phenoxazine (179.2 mg, 0.9 mmol), sodium tert-butoxide (213.5 mg, 2.2 mmol), Pd (OAc)<sub>2</sub> (5.9 mg, 0.02 mmol), (tBu)<sub>3</sub>P (26.9 mg, 0.1 mmol) and toluene (5.0 mL) were added to a 50.0 mL round-bottom flask. The mixture was stirred at 115 °C for 18 h under a nitrogen atmosphere. After cooling to room temperature, the mixture was poured into water and extracted with dichloromethane. The combined organic layers were washed with water, dried over anhydrous MgSO<sub>4</sub> and evaporated to dryness. The crude was purified by silica gel column (dichloromethane /petroleum ether = 3/1, v/v) to give orange-red powder of **(R)-ad-PXZ/(S)-ad-PXZ**.

For **(R)-4** (230.0 mg, yield: 60 %): <sup>1</sup>H NMR (400 MHz, Chloroform-d) δ 9.32 (s, 2H), 8.44 (s, 2H), 8.26 (d, J = 9.2 Hz, 2H), 7.67 (d, J = 7.1 Hz, 2H), 7.57 (td, J = 6.3, 5.9, 2.9

Hz, 4H), 7.40 (dd, J = 8.9, 2.5 Hz, 2H), 6.93 (d, J = 8.9 Hz, 2H), 6.67 (d, J = 7.9 Hz, 4H), 6.61 (t, J = 6.9 Hz, 4H), 6.51 (t, J = 7.7 Hz, 4H), 5.85 (d, J = 9.4 Hz, 4H), 2.62 (s, 6H). <sup>13</sup>C NMR (101 MHz, CDCl<sub>3</sub>) δ 179.67, 146.25, 143.33, 141.83, 138.01, 136.77, 136.68, 134.87, 133.87, 132.94, 132.10, 130.58, 130.22, 130.01, 129.82, 129.00, 126.34, 125.39, 124.60, 123.77, 122.99, 121.87, 120.61, 118.87, 115.40, 112.98, 41.17. MALDI-TOF (ESI) m/z calcd for C<sub>60</sub>H<sub>38</sub>N<sub>4</sub>O<sub>4</sub><sup>+</sup> [M+H]<sup>+</sup> 878.2893, found 878.28856 (**Fig S9, S11 and S13**).

For (**S**)-**4** (230.0 mg, yield:85 %): <sup>1</sup>H NMR (400 MHz, Chloroform-d) δ 9.32 (s, 2H), 8.44 (s, 2H), 8.26 (d, J = 6.9 Hz, 2H), 7.68 (d, J = 7.4 Hz, 2H), 7.56 (q, J = 7.1, 6.7 Hz, 4H), 7.40 (d, J = 8.9 Hz, 2H), 6.93 (d, J = 8.9 Hz, 2H), 6.68 (d, J = 7.9 Hz, 4H), 6.61 (t, J = 7.6 Hz, 4H), 6.51 (t, J = 7.7 Hz, 4H), 5.85 (d, J = 9.5 Hz, 4H), 2.63 (s, 6H). <sup>13</sup>C NMR (101 MHz, CDCl<sub>3</sub>) δ 179.15, 143.80, 136.77, 136.24, 133.88, 132.11, 130.58, 130.23, 130.01, 129.83, 129.27, 125.86, 125.83, 125.40, 124.68, 123.62, 123.00, 121.46, 118.87, 115.41, 113.38, 112.98, 40.75. MALDI-TOF (ESI) m/z calcd for C<sub>60</sub>H<sub>38</sub>N<sub>4</sub>O<sub>4</sub><sup>+</sup> [M+H]<sup>+</sup> 878.2893, found 878.28847 (**Fig S10, S12 and S14**).

### NMR and MS spectra

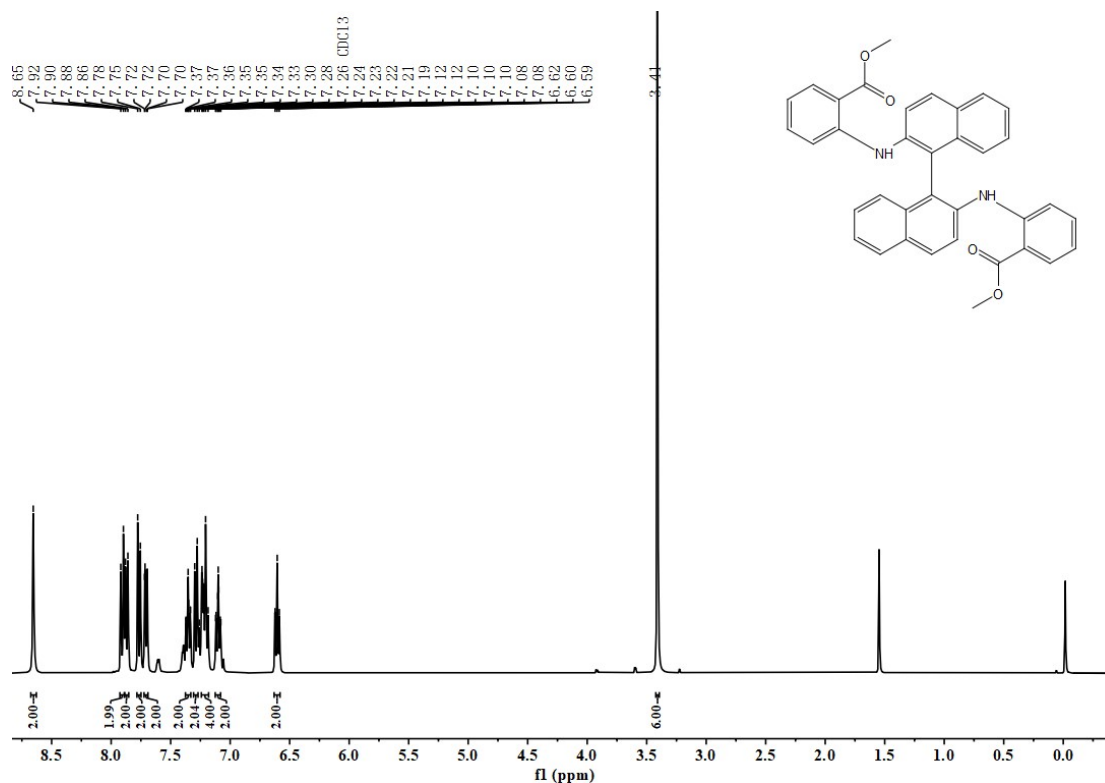



Fig S1.  $^1\text{H}$  NMR spectrum of (*R*)-**1** in  $\text{CDCl}_3$  at room temperature

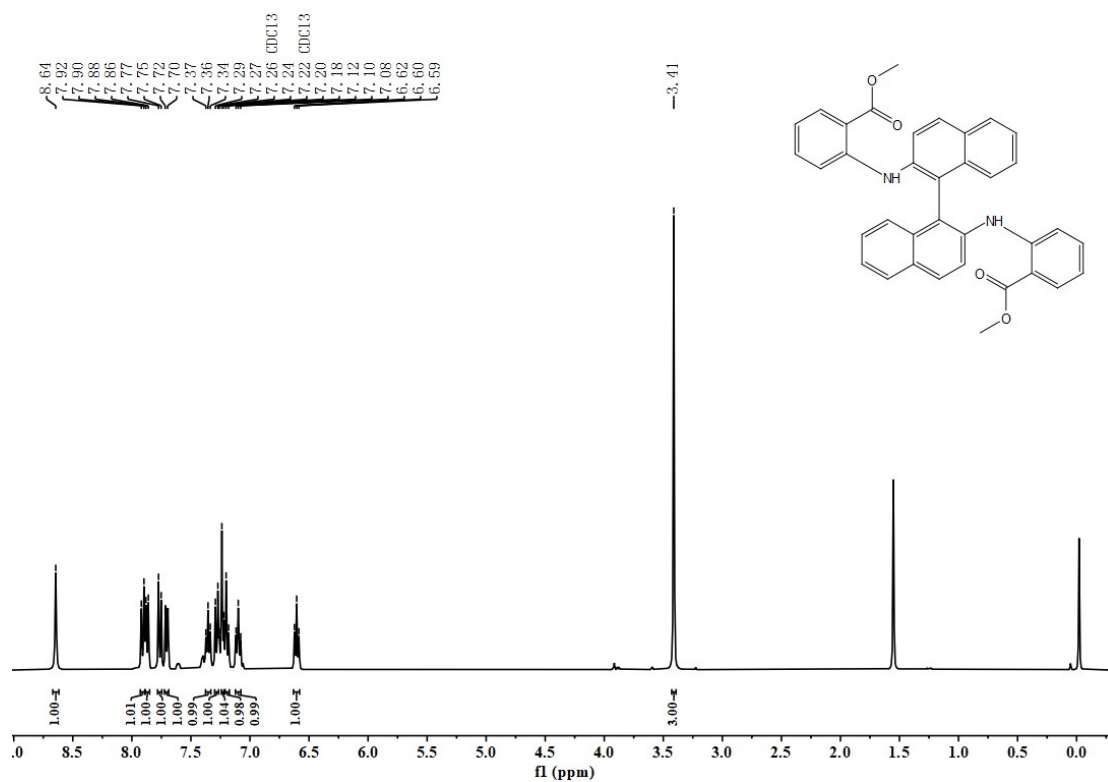

Fig S2.  $^1\text{H}$  NMR spectrum of (*S*)-**1** in  $\text{CDCl}_3$  at room temperature

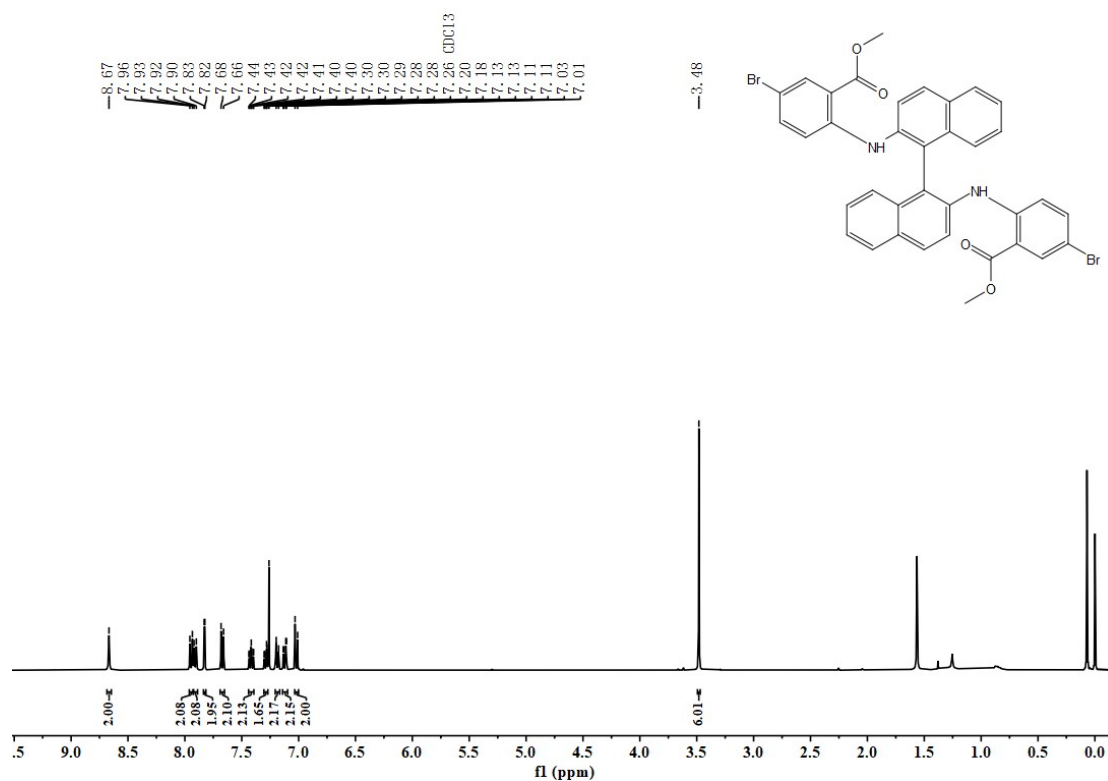

Fig S3.  $^1\text{H}$  NMR spectrum of (*R*)-**2** in  $\text{CDCl}_3$  at room temperature

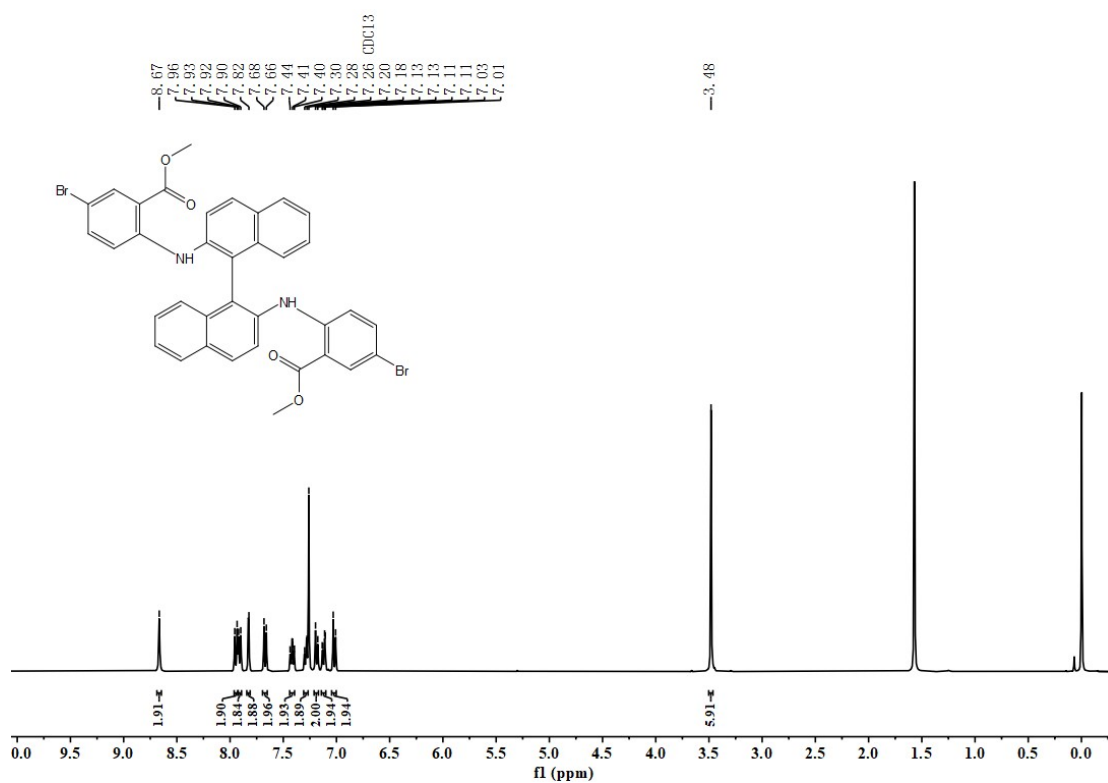

Fig S4. <sup>1</sup>H NMR spectrum of **(S)-2** in CDCl<sub>3</sub> at room temperature

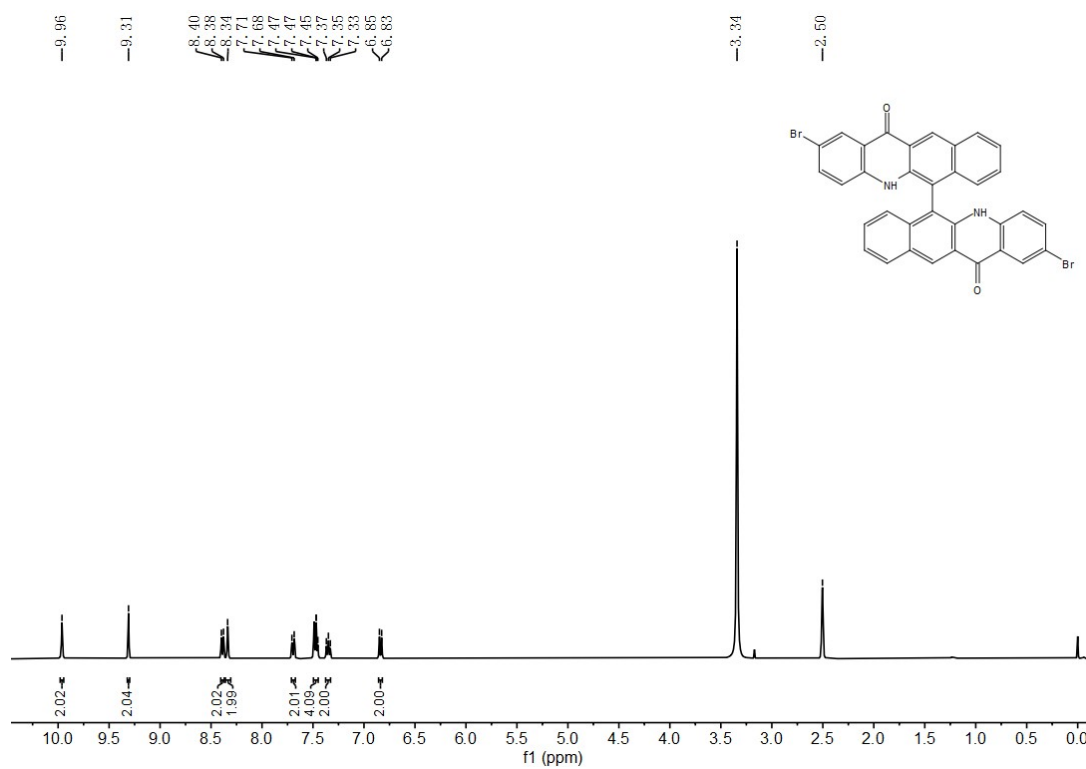

Fig S5. <sup>1</sup>H NMR spectrum of **(R)-3** in DMSO at room temperature

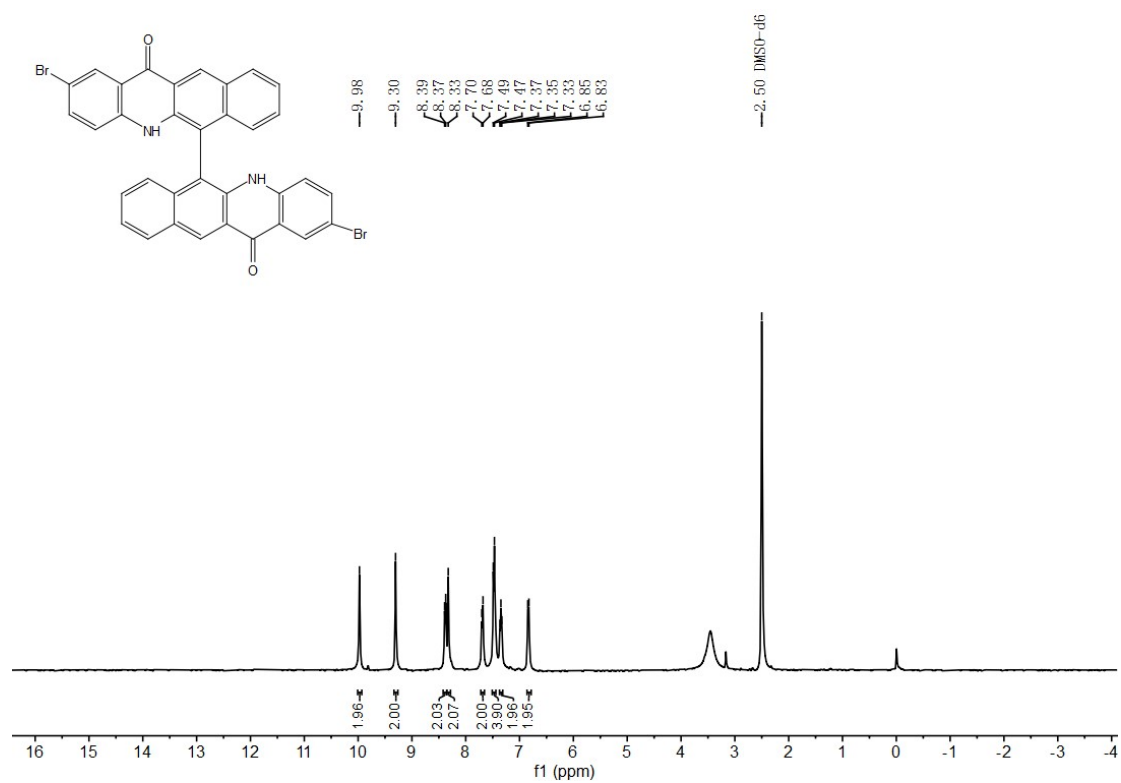

**Fig S6.**  $^1\text{H}$  NMR spectrum of **(S)-3** in DMSO at room temperature

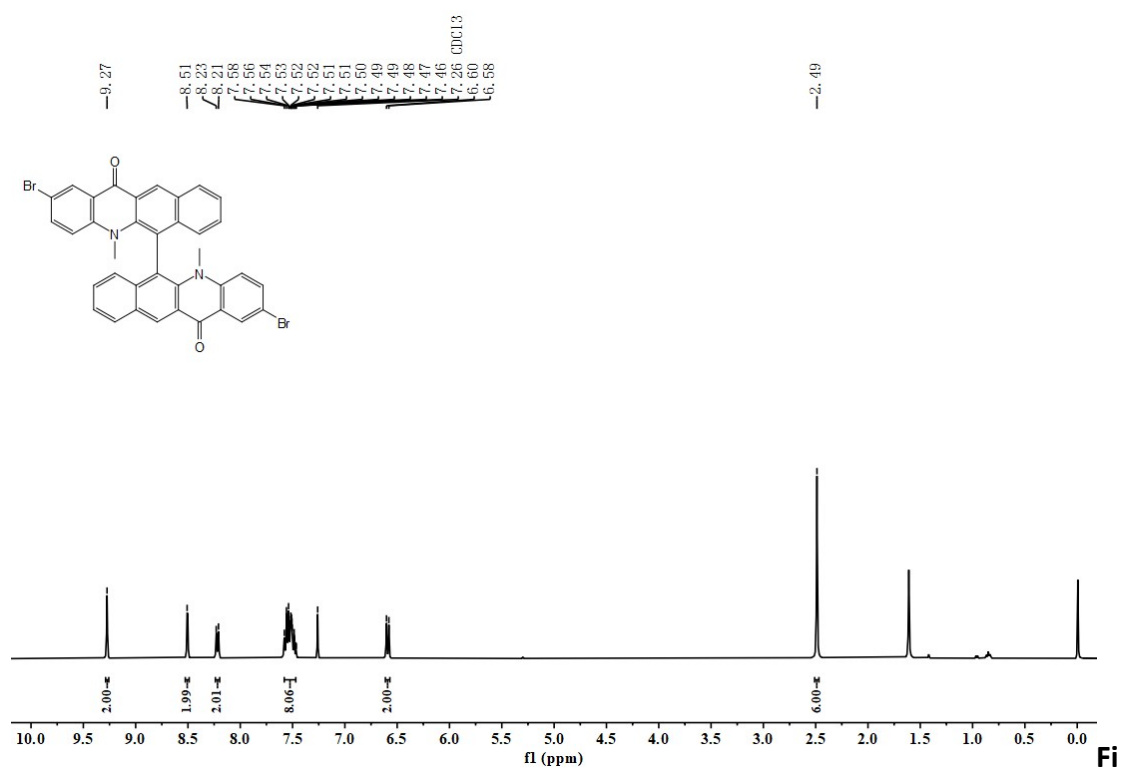

**g S7.**  $^1\text{H}$  NMR spectrum of **(R)-4** in  $\text{CDCl}_3$  at room temperature

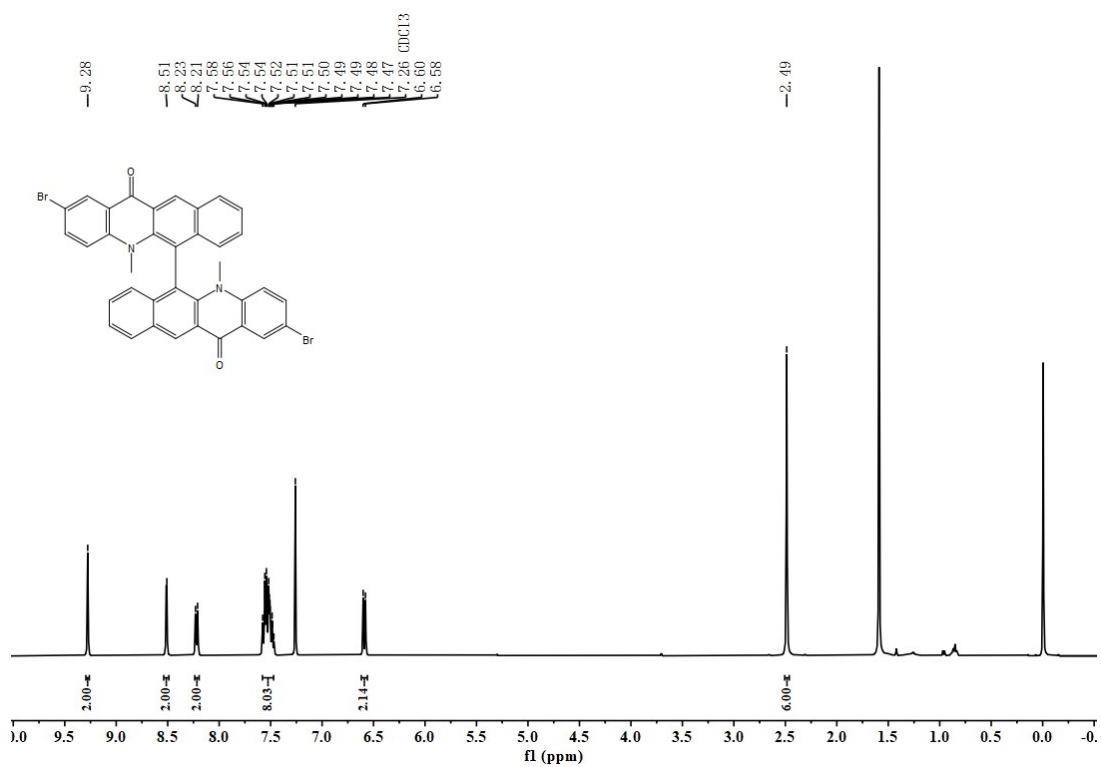

Fig S8.  $^1\text{H}$  NMR spectrum of (*S*)-4 in  $\text{CDCl}_3$  at room temperature

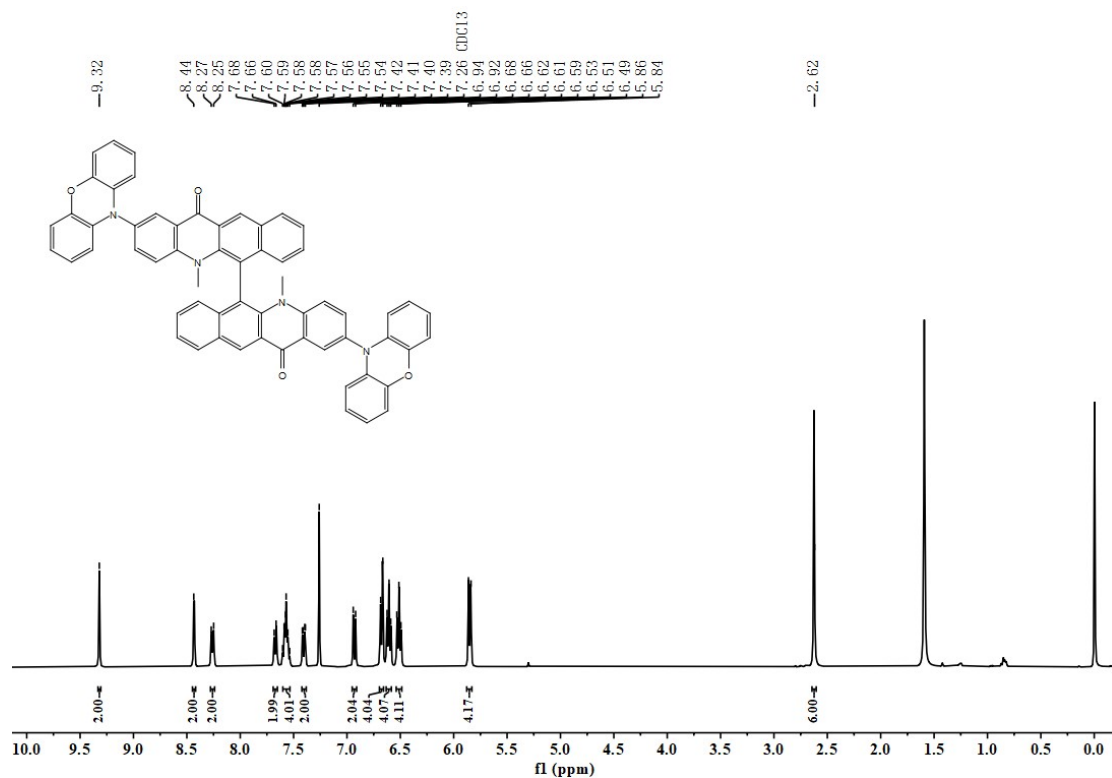

Fig S9.  $^1\text{H}$  NMR spectrum of (*R*)-ad-PXZ in  $\text{CDCl}_3$  at room temperature

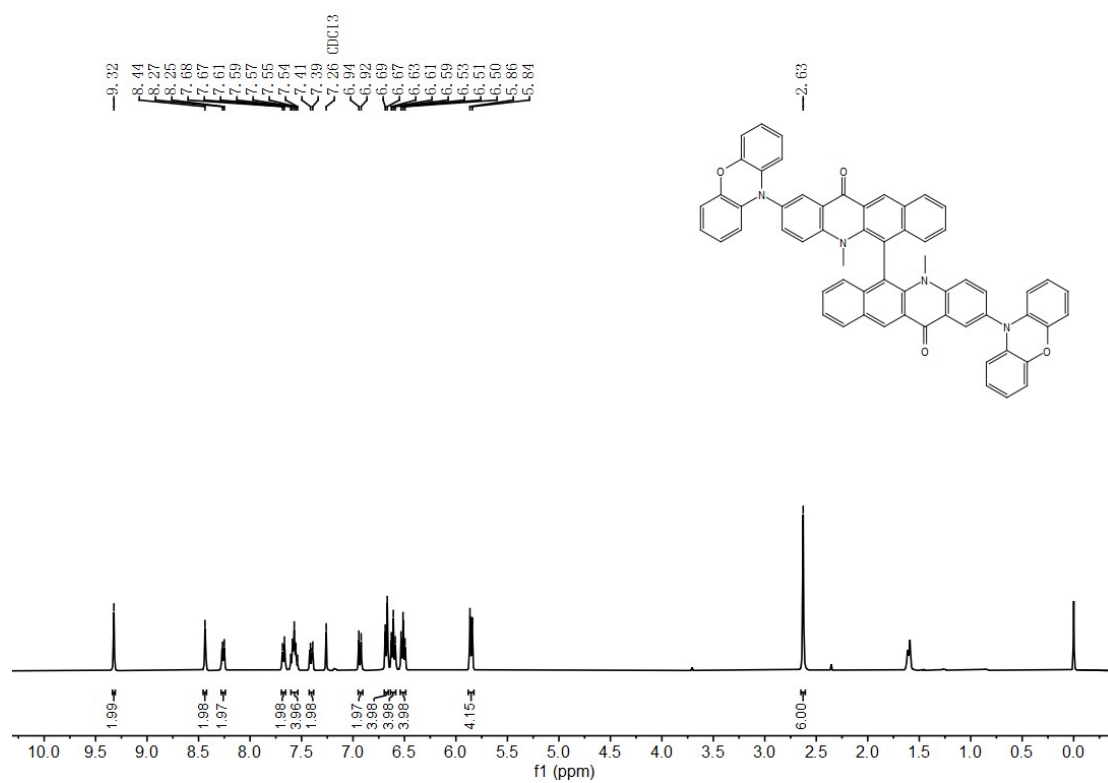

**Fig S10.**  $^1\text{H}$  NMR spectrum of **(S)-ad-PXZ** in  $\text{CDCl}_3$  at room temperature

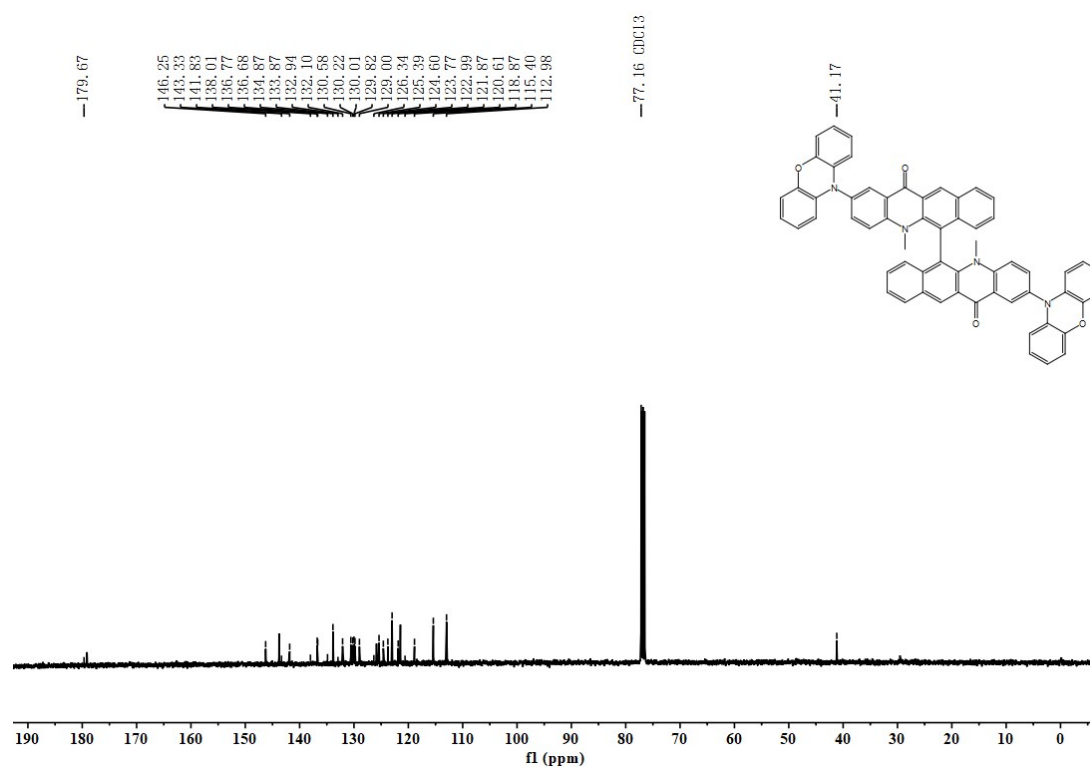

**Fig S11.**  $^{13}\text{C}$  NMR spectrum of **(R)-ad-PXZ** in  $\text{CDCl}_3$  at room temperature

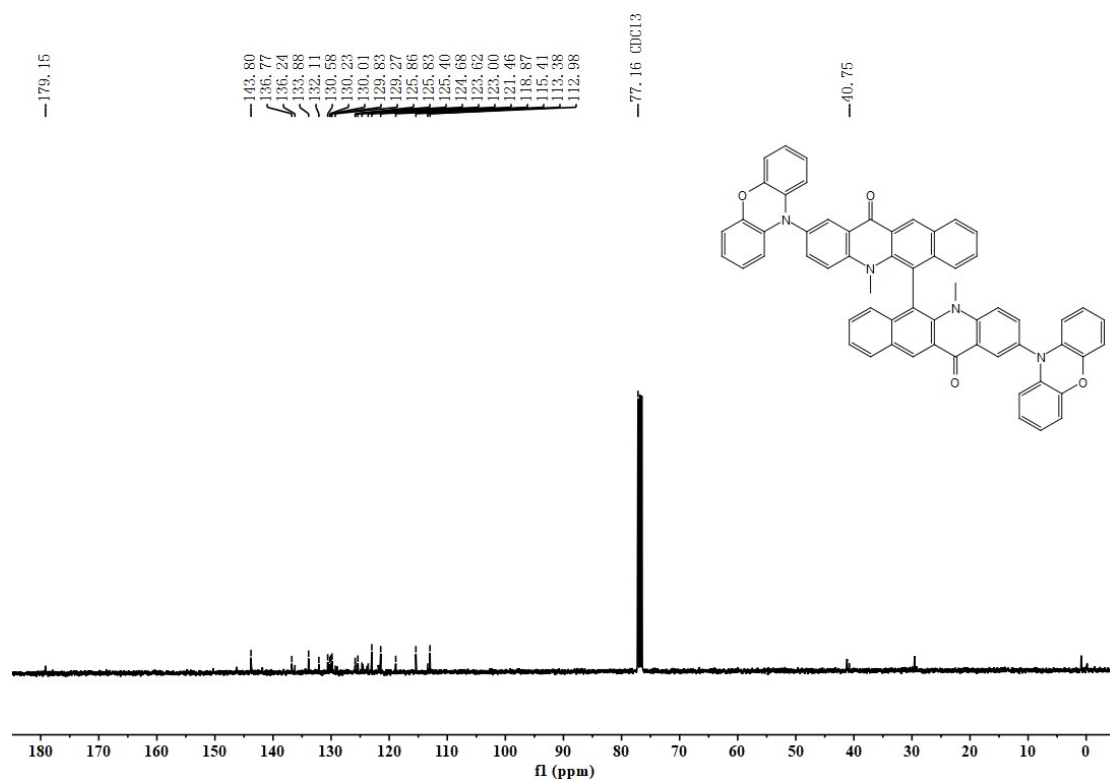

Fig S12. <sup>13</sup>C NMR spectrum of *(S)*-ad-PXZ in CDCl<sub>3</sub> at room temperature

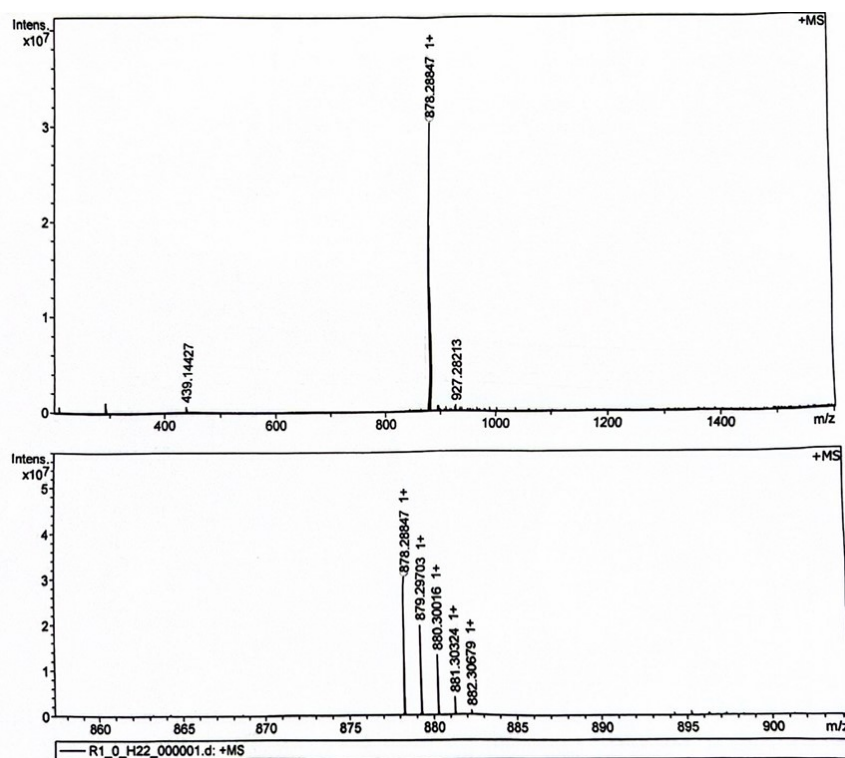

Fig S13. TOF-MS spectrum of *(R)*-ad-PXZ in CDCl<sub>3</sub> at room temperature

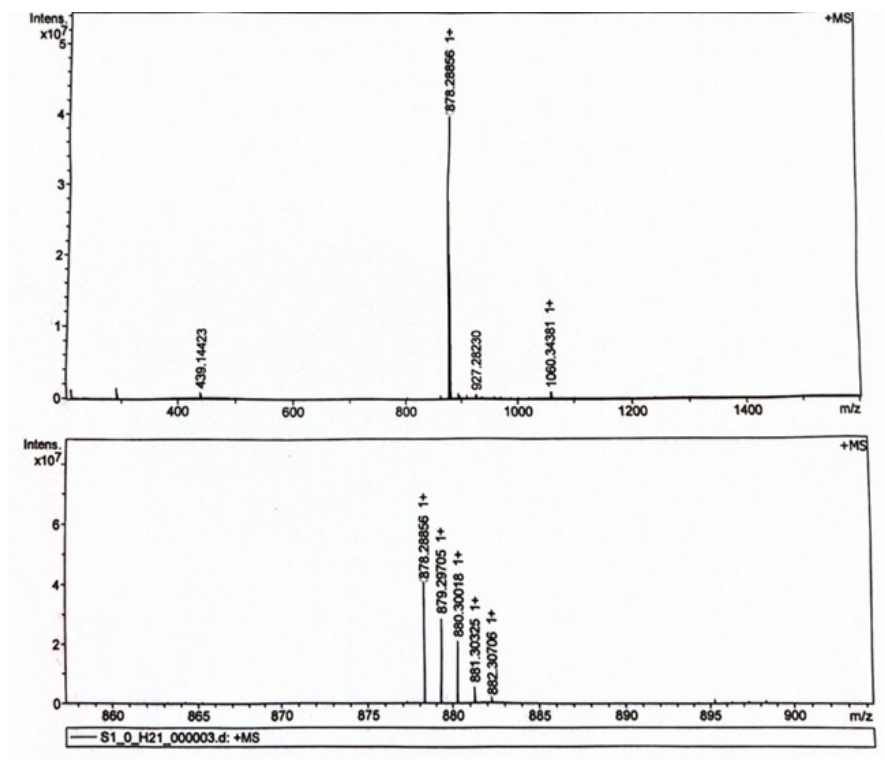

**Fig S14.** TOF-MS spectrum of **(S)-ad-PXZ** in  $\text{CDCl}_3$  at room temperature

### Thermal properties

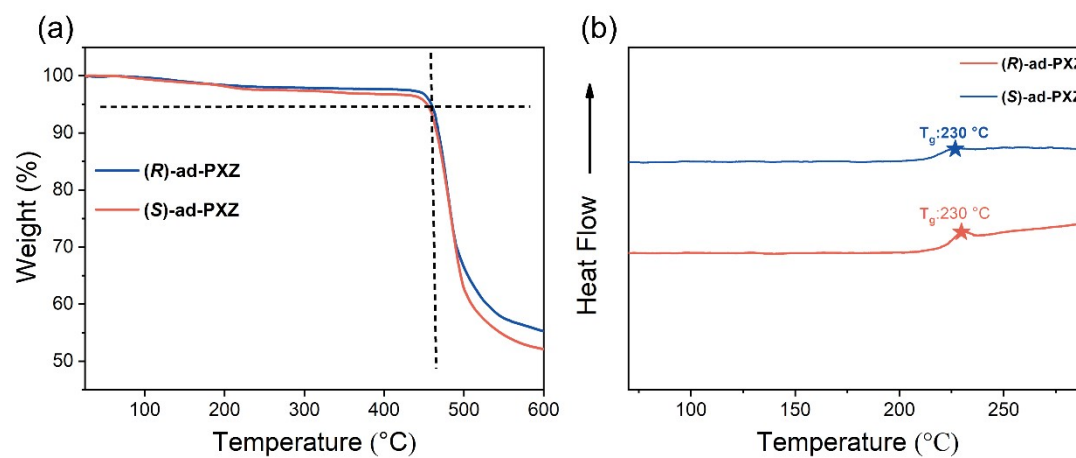

**Fig S15.** (a) TGA and (b) DSC curves of the **(R)-ad-PXZ** and **(S)-ad-PXZ**.

### Electrochemical property

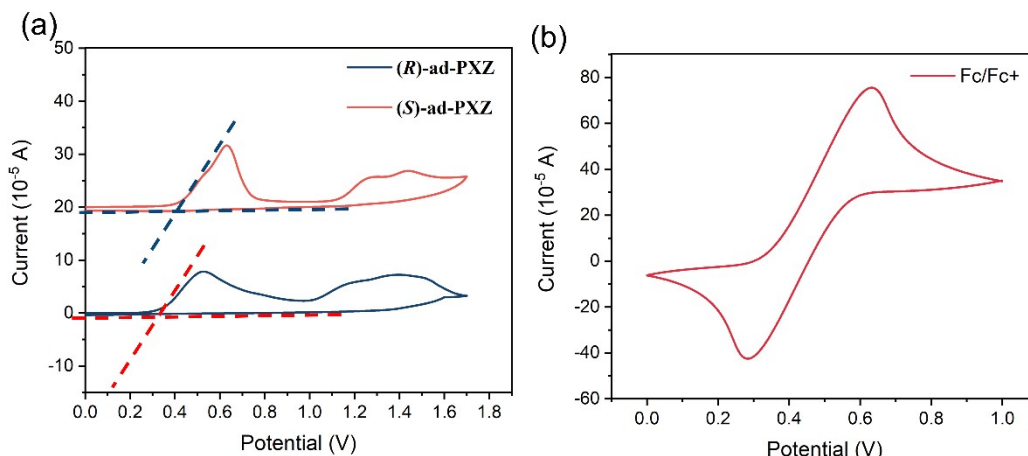

**Fig S16.** CV curves of the **(R)-ad-PXZ** and **(S)-ad-PXZ**.

### Theoretical calculation

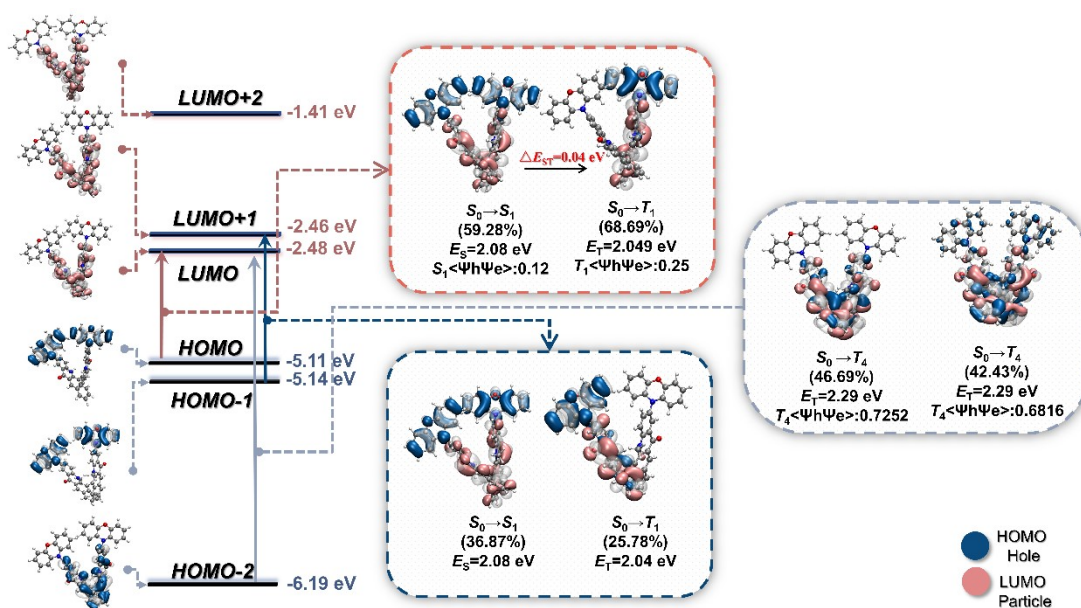

**Fig S17.** Theoretical simulation of ground and excited states for **(R)-ad-PXZ**. Contours and energy levels of the first FMOs for ground-state ( $S_0$ ) **(R)-ad-PXZ** and their contributions to the singlet and triplet excitations ( $S_1$ ,  $T_1$ ,  $T_4$ ). HOMO and LUMO refer to the highest occupied and lowest unoccupied molecular orbitals, respectively. Contours of “hole” and “particle” and transition parameters for these excitations simulated with natural transition orbital (NTO) analysis (center in boxes).  $E_e$  and  $\langle \psi_h \psi_e \rangle$  refer to excited-state energy level, the overlap integral, respectively. The subscripts of  $S$  and  $T$  refer to singlet and triplet states, respectively.



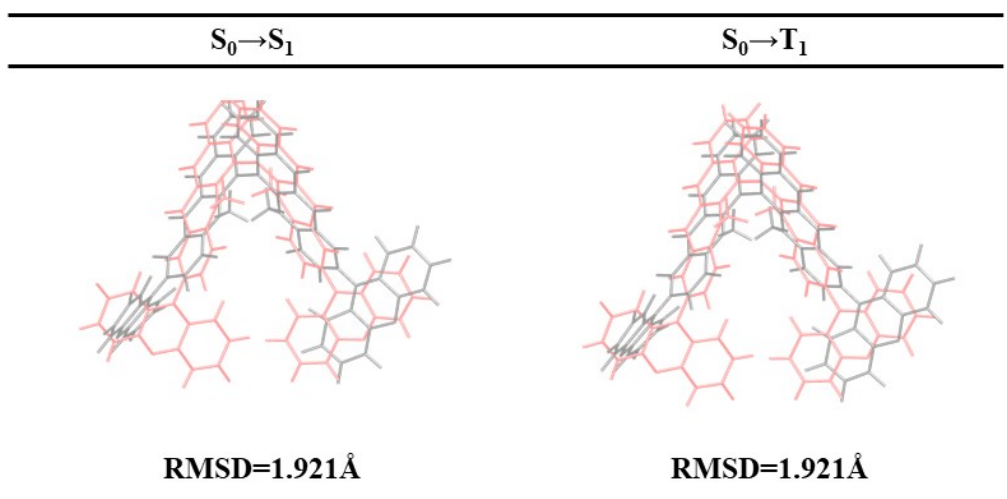

**Fig S18.** Configuration deviations between the  $S_0$  (gray),  $S_1$  (pink) and  $T_1$  (pink) states of (*R*)-ad-PXZ

### Photophysical properties

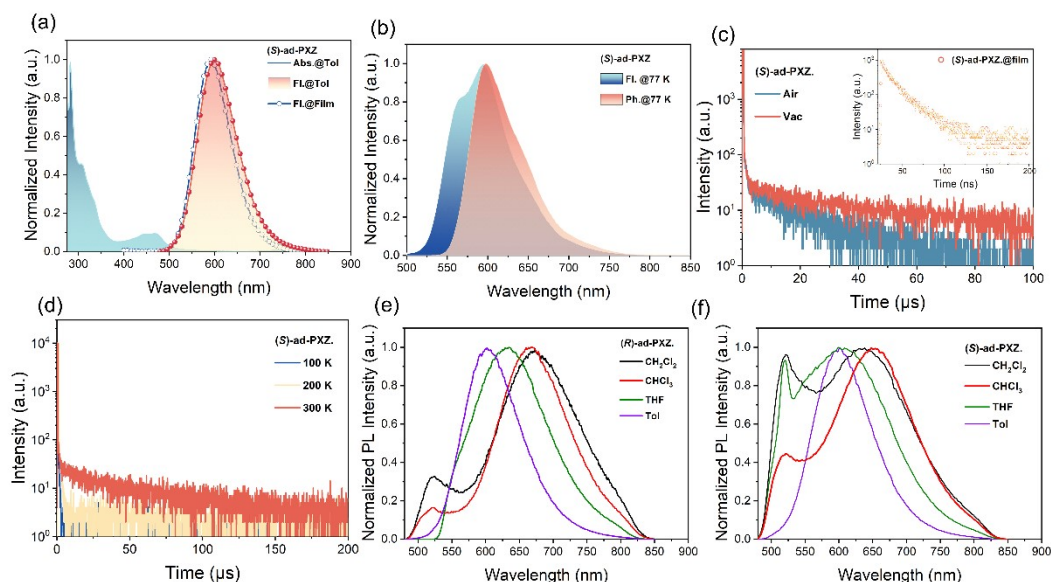

**Fig S19.** a) UV-vis absorption and PL spectra of (*S*)-ad-PXZ in toluene ( $10^{-5}$  M) and 10 wt % (*S*)-ad-PXZ doped film in TCTA ( $\lambda_{\text{ex}}=450$  nm); b) Fluorescence and phosphorescence spectra of (*S*)-ad-PXZ in toluene at 77 K ( $\lambda_{\text{ex}}=450$  nm); c) Transient PL spectra of the doped films of (*S*)-ad-PXZ in air and vacuum (Inset: prompt PL decay curves measured in a time window of 200 ns) ( $\lambda_{\text{ex}}=365$  nm); d) Temperature-dependent transient PL decay spectra of the (*S*)-ad-PXZ doped film; ( $\lambda_{\text{ex}}=365$  nm) e, f) The solvatochromism effect of (*R*)-ad-PXZ/(*S*)-ad-PXZ in different solvent.

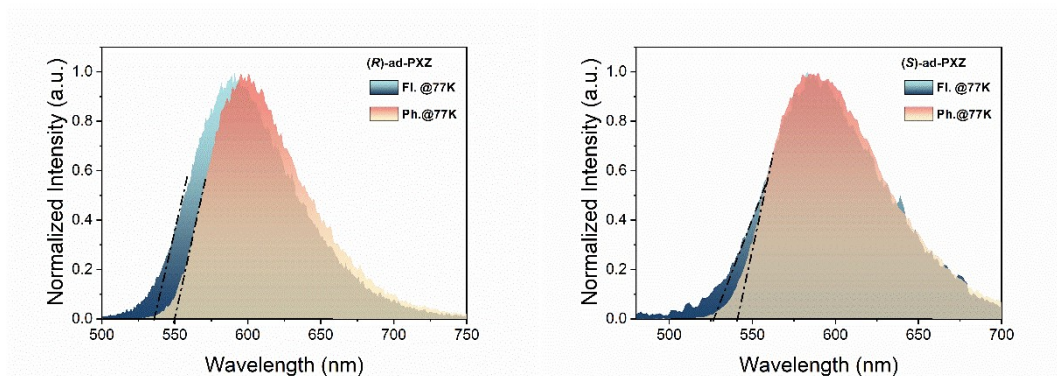

**Fig S20** Fluorescence and phosphorescence spectra in 10 wt% doped films at 77 K ( $\lambda_{\text{ex}}=365$  nm).

**Table S1.** Summary of photophysical and electrochemical properties of **(R)-ad-PXZ** and **(S)-ad-PXZ**

| Compound          | $\lambda_{\text{abs}}$<br>a)<br>[nm] | $\lambda_{\text{em}}$<br>[nm] | PLQY<br>b)<br>[%] | $\tau_{\text{p}}$ <sup>c)</sup><br>[ns] | $\tau_{\text{d}}$ <sup>c)</sup><br>[ $\mu\text{s}$ ] | $\varphi_{\text{p}}$<br>c)<br>[%] | $\varphi_{\text{d}}$<br>c)<br>[%] | HOMO/LUMO<br>d)<br>[eV] | $(\Delta E_{\text{ST}})$<br>e)<br>[eV] | $g_{\text{PL}}$<br>[ $\times 10^{-3}$ ] |
|-------------------|--------------------------------------|-------------------------------|-------------------|-----------------------------------------|------------------------------------------------------|-----------------------------------|-----------------------------------|-------------------------|----------------------------------------|-----------------------------------------|
| <b>(R)-ad-PXZ</b> | 295,                                 | 602<br>a)                     | 15.80             | 21                                      | 51.95                                                | 73                                | 27                                | -4.86/-2.78             | 0.1                                    | +2.8 <sup>f)</sup>                      |
|                   | 450                                  | 596<br>b)                     |                   |                                         |                                                      |                                   |                                   |                         |                                        | +5.8 <sup>g)</sup>                      |
| <b>(S)-ad-PXZ</b> | 295,                                 | 602<br>a)                     | 11.65             | 19                                      | 43.52                                                | 76                                | 24                                | -4.81/2.73              | 0.1                                    | -2.9 <sup>f)</sup> ,                    |
|                   | 450                                  | 596<br>b)                     |                   |                                         |                                                      |                                   |                                   |                         |                                        | -6.4 <sup>g)</sup>                      |

a) in toluene ( $1.0 \times 10^{-5}$  M) at room temperature. b) 10 wt% **(R)-ad-PXZ**/**(S)-ad-PXZ** doped films in TCTA. c) Prompt and delayed lifetime of the doped films in TCTA d) HOMO level measured from the oxidation potential in  $10^{-4}$  M acetonitrile solution by cyclic voltammetry with ferrocene as the internal standard, and LUMO level calculated from HOMO- $E_{\text{g}}$  e) Determined from fluorescence and phosphorescence emission spectra at 77 K in solution. f)  $g_{\text{PL}}$  factors in toluene; g)  $g_{\text{PL}}$  factors in doped film.

### Electroluminescence performances

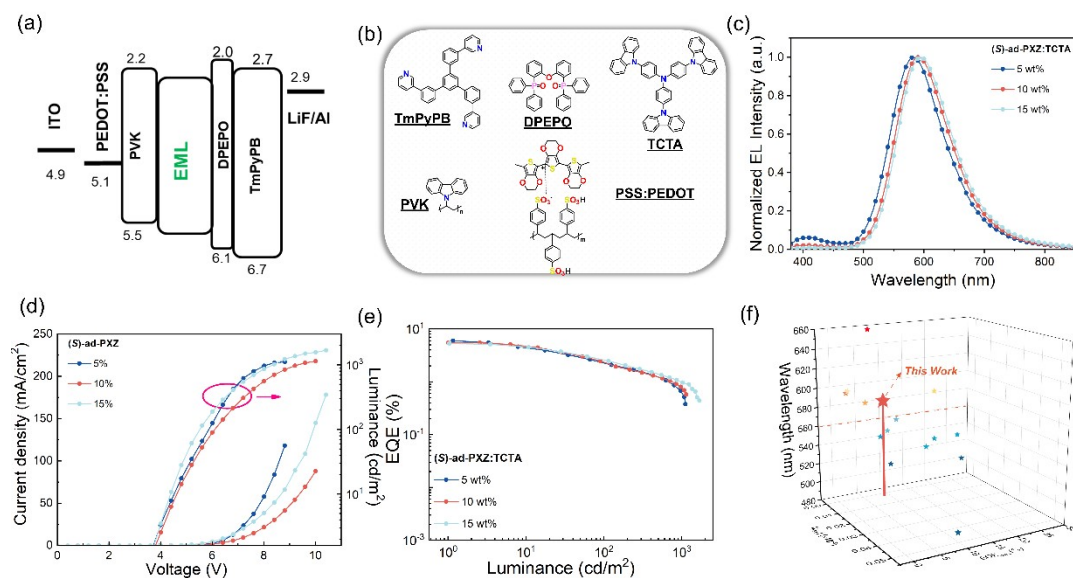

**Fig S21.** a) The structures of the solution-processable OLED materials; b) corresponding chemical structures of the used materials. c) normalized EL spectra of **(S)-ad-PXZ**; d) current density–voltage–luminance (J–V–L) characteristics; e) external quantum efficiency versus luminance (EQE–L) curves; f) Three-dimensional diagram summarizing the EQE, Wavelength and  $g_{EL}$  value of the representative solution-processed CP-OLEDs

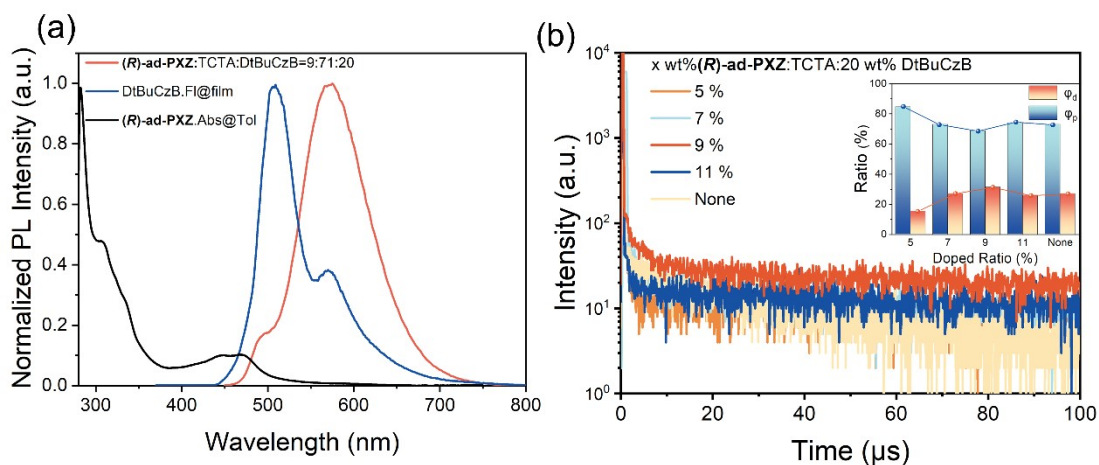

**Fig S22** a) UV–vis absorption spectra of **(R)-ad-PXZ** in toluene and PL spectra of 9 wt % **(R)-ad-PXZ** with 20 wt % DtBuCzB in TCTA doped films ( $\lambda_{ex}=450$  nm); b) Transient PL spectra of **(R)-ad-PXZ** with the different dopant sensitizer ratios (None, 5 wt%, 7 wt%, 9 wt%, 11wt%) (Inset: Red is the ratios of delayed components, blue is the proportion of prompt components);

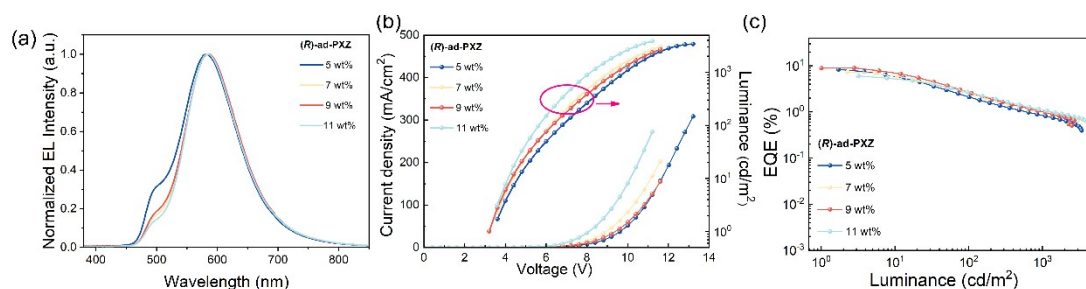

**Fig S23.** a) normalized EL spectra of X wt% (**R**)-ad-PXZ with 20 wt% DtBuCzB in TCTA doped films; b) current density–voltage–luminance (*J–V–L*) characteristics; c) external quantum efficiency versus luminance (*EQE–L*) curves

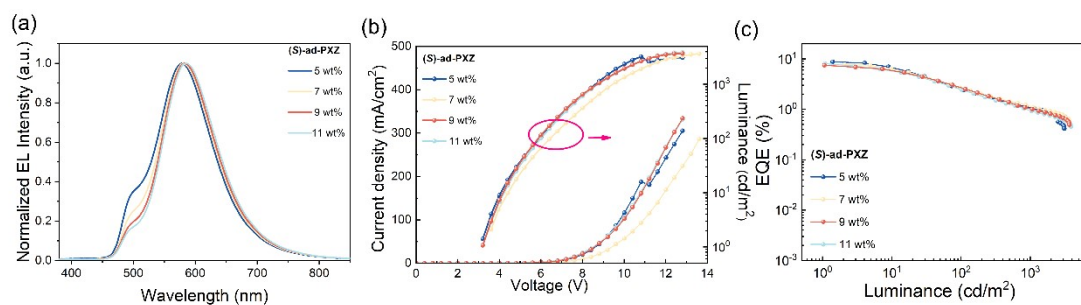

**Fig S24** a) normalized EL spectra of X wt% (**S**)-ad-PXZ with 20 wt% DtBuCzB in TCTA doped films; b) current density–voltage–luminance (*J–V–L*) characteristics; c) external quantum efficiency versus luminance (*EQE–L*) curves;

**Table S2.** Summary of EL Performance of the best performance CP-OLED and TSCP-OLED using the **(R)-ad-PXZ** as the emitter.

| Device        | EML                                 | $V_{on}$ <sup>a)</sup><br>[V] | $L_{max}$ <sup>b)</sup><br>[cd m <sup>-2</sup> ] | $CE_{max}$ <sup>c)</sup><br>[cd A <sup>-1</sup> ] | $EQE_{max}$ <sup>d)</sup><br>[%] | $\lambda_{EL}$ <sup>e)</sup><br>[nm] | CIE <sup>f)</sup><br>[x, y] | $g_{EL}$ <sup>g)</sup><br>[×10 <sup>-3</sup> ] |
|---------------|-------------------------------------|-------------------------------|--------------------------------------------------|---------------------------------------------------|----------------------------------|--------------------------------------|-----------------------------|------------------------------------------------|
| CP-OLED       | <b>(R)-ad-PXZ:</b><br>TCTA          | 4.0                           | 1385                                             | 12.83                                             | 5.8                              | 588                                  | (0.52,<br>0.47)             | +1.4                                           |
| TSCP<br>-OLED | <b>(R)-ad-PXZ:</b><br>TCTA: DtBuCzB | 3.2                           | 2509                                             | 20.42                                             | 9.0                              | 584                                  | (0.57,<br>0.49)             | +1.3                                           |

<sup>a)</sup>  $V_{on}$ , the operating voltage at a brightness of 1 cd/m<sup>2</sup>. <sup>b)</sup> Maximum luminance <sup>c)</sup> Maximum current efficiency. <sup>d)</sup> Maximum external quantum efficiency. <sup>e)</sup> Peaks of electroluminescence band. <sup>f)</sup> Commission Internationale de L'Eclairage 1931 coordinates. <sup>g)</sup> Electroluminescence dissymmetry factor.

**Table S3.** Summary of EL Performance of CP-OLED using different dopant X wt % **(R)-ad-PXZ** and **(S)-ad-PXZ** in TCTA as the emitter.

| EML                        | Dopant<br>[wt%] | $V_{on}$ <sup>a)</sup><br>[V] | $L_{max}$ <sup>b)</sup><br>[cd m <sup>-2</sup> ] | $CE_{max}$ <sup>c)</sup><br>[cd A <sup>-1</sup> ] | $EQE_{max}$ <sup>d)</sup><br>[%] | $\lambda_{EL}$ <sup>e)</sup><br>[nm] | CIE <sup>f)</sup><br>[x, y] |
|----------------------------|-----------------|-------------------------------|--------------------------------------------------|---------------------------------------------------|----------------------------------|--------------------------------------|-----------------------------|
| <b>(R)-ad-PXZ:</b><br>TCTA | 5               | 4.0                           | 1434                                             | 12.87                                             | 5.1                              | 574                                  | (0.44,0.49)                 |
|                            | 10              | 4.0                           | 1385                                             | 12.83                                             | 5.8                              | 588                                  | (0.52,0.47)                 |
|                            | 15              | 4.0                           | 1469                                             | 7.83                                              | 3.9                              | 594                                  | (0.53,0.46)                 |
| <b>(S)-ad-PXZ:</b><br>TCTA | 5               | 3.6                           | 1112                                             | 14.36                                             | 6.0                              | 582                                  | (0.49,0.47)                 |
|                            | 10              | 3.6                           | 1141                                             | 11.67                                             | 5.5                              | 592                                  | (0.52,0.46)                 |
|                            | 15              | 3.6                           | 1683                                             | 10.39                                             | 5.3                              | 594                                  | (0.54,0.45)                 |

<sup>a)</sup>  $V_{on}$ , the operating voltage at a brightness of 1 cd/m<sup>2</sup>. <sup>b)</sup> Maximum luminance <sup>c)</sup> Maximum current efficiency. <sup>d)</sup> Maximum external quantum efficiency. <sup>e)</sup> Peaks of electroluminescence band. <sup>f)</sup> Commission Internationale de L'Eclairage 1931 coordinates.

**Table S4.** Summary of EL Performance of TSCP-OLED using different dopant Xwt% **(R)-ad-PXZ** and **(S)-ad-PXZ** in TCTA as the emitter and 20 wt% DtBuCZB as the sensitizer.

| EML                                              | Dopant<br>[wt%] | $V_{on}$ <sup>a)</sup><br>[V] | $L_{max}$ <sup>b)</sup><br>[cd m <sup>-2</sup> ] | $CE_{max}$ <sup>c)</sup><br>[cd A <sup>-1</sup> ] | $EQE_{max}$ <sup>d)</sup><br>[%] | $\lambda_{EL}$ <sup>e)</sup><br>[nm] | CIE <sup>f)</sup><br>[x, y] |
|--------------------------------------------------|-----------------|-------------------------------|--------------------------------------------------|---------------------------------------------------|----------------------------------|--------------------------------------|-----------------------------|
| <b>(R)-ad-PXZ:</b><br>TCTA:<br>20 wt%<br>DtBuCZB | 5               | 3.6                           | 3406                                             | 19.05                                             | 8.3                              | 582                                  | (0.47,<br>0.49)             |
|                                                  | 7               | 3.6                           | 3049                                             | 17.17                                             | 7.4                              | 584                                  | (0.50,<br>0.48)             |
|                                                  | 9               | 3.2                           | 2509                                             | 20.42                                             | 9.0                              | 584                                  | (0.57,<br>0.48)             |
|                                                  | 11              | 3.6                           | 3843                                             | 14.07                                             | 6.0                              | 584                                  | (0.50,<br>0.48)             |
| <b>(S)-ad-PXZ:</b><br>TCTA:<br>20 wt%<br>DtBuCZB | 5               | 3.2                           | 3110                                             | 22.38                                             | 8.7                              | 587                                  | (0.46,<br>0.49)             |
|                                                  | 7               | 3.6                           | 3645                                             | 20.00                                             | 7.8                              | 580                                  | (0.48,<br>0.49)             |
|                                                  | 9               | 3.2                           | 3877                                             | 18.78                                             | 8.0                              | 582                                  | (0.49,<br>0.48)             |
|                                                  | 11              | 3.2                           | 3674                                             | 17.42                                             | 7.5                              | 586                                  | (0.50,<br>0.48)             |

<sup>a)</sup>  $V_{on}$ , the operating voltage at a brightness of 1 cd/m<sup>2</sup>. <sup>b)</sup> Maximum luminance <sup>c)</sup> Maximum current efficiency. <sup>d)</sup> Maximum external quantum efficiency. <sup>e)</sup> Peaks of electroluminescence band. <sup>f)</sup> Commission Internationale de L'Eclairage 1931 coordinates.
